# Supplementary material for: The Tomato Metallocarboxypeptidase Inhibitor I, which Interacts with a Heavy Metal-Associated Isoprenylated Protein, Is Implicated in Plant Response to Cadmium
Source: PubMed Central journal article supplement (PMC7038206; doi:10.3390/molecules25030700), 2020-02-06
Supplement: molecules-25-00700-s001.pdf [file molecules-25-00700-s001.pdf]

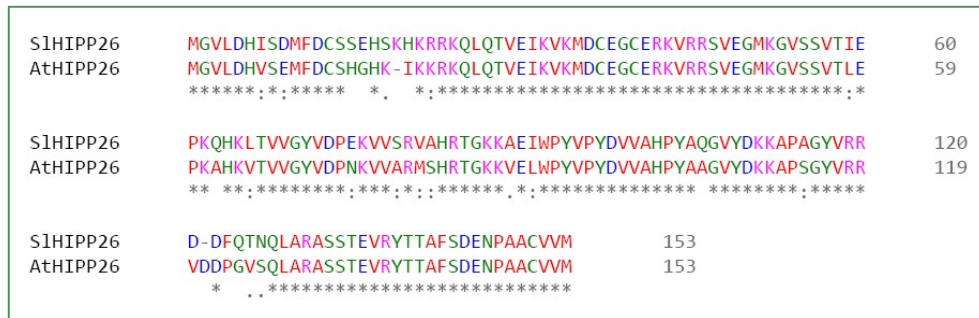

**Figure 1.** Sequence alignment of HIPP26 proteins of tomato and *Arabidopsis* (At4G38580) obtained by CLUSTAL Omega (<https://www.ebi.ac.uk/Tools/msa/clustalo/>). The consensus symbols: "\*" identical residues; ":" residues with strongly similar properties; "." residues with weakly similar properties.

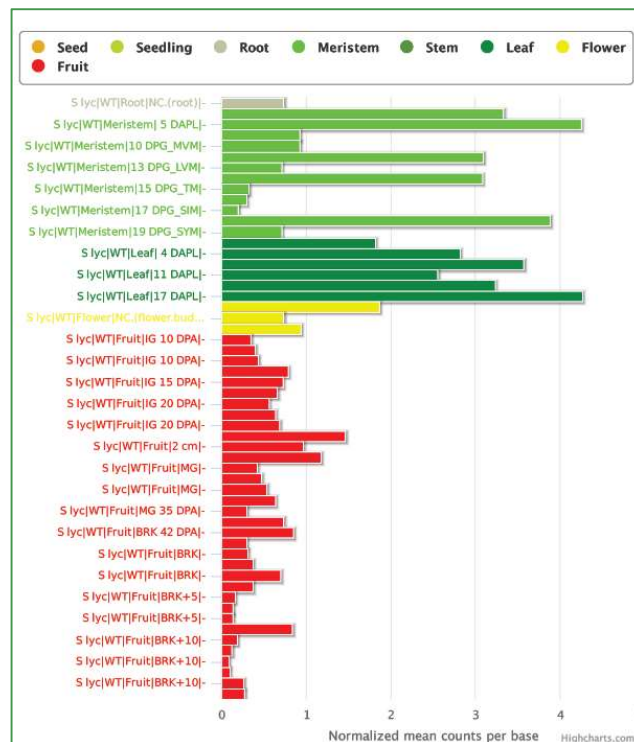

**Figure 2.** Expression of SlHIPP26 gene in organs of various *S. lycopersicum* cultivars.

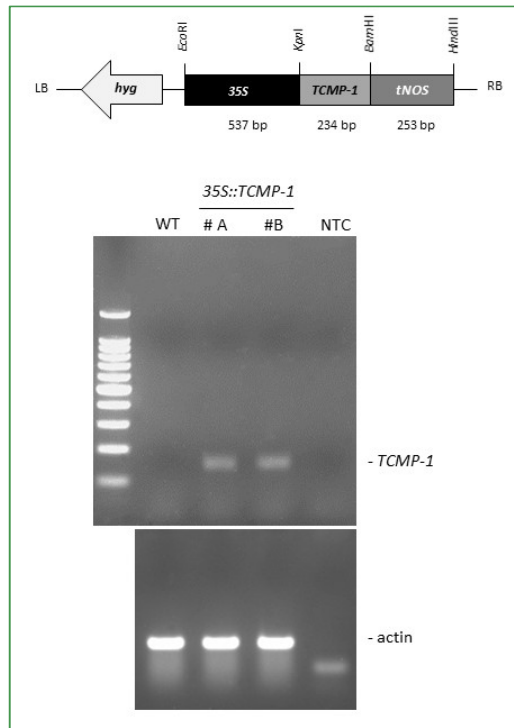

**Figure 3.** (Upper) Schematic drawing of *35S::TCMP-1* gene construct cloned into the T-DNA of the pCAMBIA 1200 vector. (Lower) RT-PCR analysis of *TCMP-1* and *actin* gene expression conducted on WT and transgenic lines. NTC, not template control.

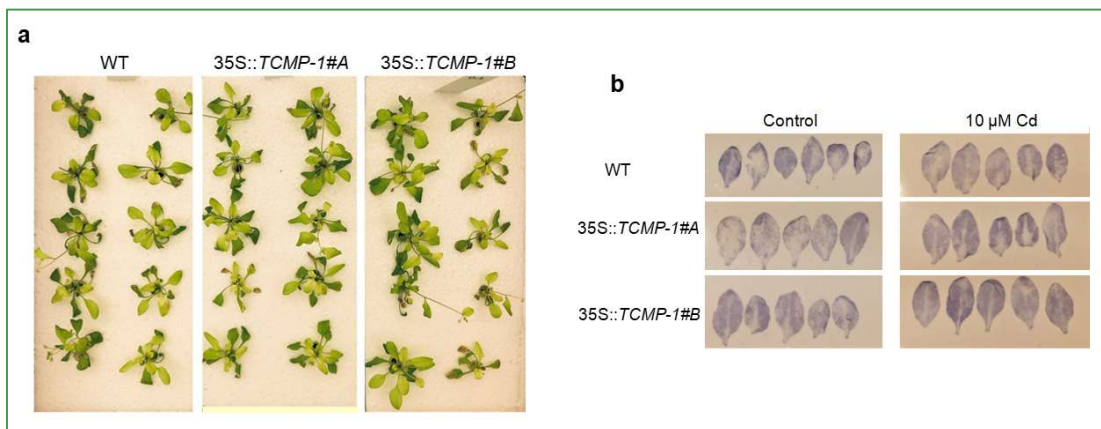

**Figure 4.** (a) Shoots of WT, *35S::TCMP-1#A* and *#B* plants after 10 days of hydroponic cultivation in the presence of 10  $\mu\text{M}$   $\text{CdSO}_4$ . (b) NBT staining to detect  $\text{O}_2^-$  in the intact leaves of plants grown for 10 day in hydroponic Hoagland solution containing 10  $\mu\text{M}$   $\text{CdSO}_4$ .

**Table 1.** List of primers used in this work.

| <b>Gene</b>                                 | <b>Application</b> | <b>Sequence (5' →3')</b>                      |
|---------------------------------------------|--------------------|-----------------------------------------------|
| <i>SlActin</i><br>(Solyc11g005330.2.1)      | Real-time          | F: TTCAAAGGGCGAGTACGACGAG                     |
|                                             | RT-PCR             | R: CAGCAGACCCGACTTCACTTTT                     |
| <i>SITCMP-1</i><br>(Solyc07g007250.4.1)     | Real-time          | F: GCTGCTCAAGATGTGATGGC                       |
|                                             | RT-PCR             | R: TCCAACAGGCCTGACAGAAC                       |
| <i>NtActin</i><br>(XM_016628756.1)          | Real-time          | F: ATCCCAGTTGCTGACAATTC                       |
|                                             | RT-PCR             | R: 5GACCCGCCATACTGGTGTGAT                     |
| <i>NtMCPIa</i><br>(AB518288.1)              | Real-time          | F: TAGGGACGATTGCTCTAAA                        |
|                                             | RT-PCR             | R: ACTCTGTTAATACGAGGTAA                       |
| <i>NtMCPIb</i><br>(AB518289.1)              | Real-time          | F: CAGGGATGATTGCTCTAGT                        |
|                                             | RT-PCR             | R: ACTTTGTTAATACGAGGTTT                       |
| <i>AtUBI10</i><br>(At4g05320)               | Real-time          | F: AGGACAAGGAAGGTATTCCTC                      |
|                                             | RT-PCR             | R: CTCCTTCTGGATGTTGTAGTC                      |
| <i>AtHIP26</i><br>(At4g38580)               | Real-time          | F: GTCGAGCTCTGGCCATATGT                       |
|                                             | RT-PCR             | R: TACACCACTGCATTTAGCGAC                      |
| <i>AtFSD1</i><br>(At4g25100)                | Real-time          | F: AGTTCTGCATCACCGAAGTCT                      |
|                                             | RT-PCR             | R: ACAAGCAAAATGAAGAACTCTGT                    |
| <i>AtFSD2</i><br>(At5g51100)                | Real-time          | F: TGTATAGTGAAGACGCCCAAT                      |
|                                             | RT-PCR             | R: AAAATCCAGATAGTAAGCGTGC                     |
| <i>AtCSD1</i><br>(At1g08830)                | Real-time          | F: AAGAAGAGATTGATGTAATAAGGA                   |
|                                             | RT-PCR             | R: CCACACTAAGCTCATAGGTTTT                     |
| <i>AtCSD2</i><br>(At2g28190)                | Real-time          | F: GGCCATGAGCTTAGTCTGAC                       |
|                                             | RT-PCR             | R: ACTTGCTTAGCCTCTGACTTA                      |
| <i>SITCMP-1 (37aa)</i><br>(NM_001247005.3)  | Y2H                | F:<br>CATGGAGGCCGAATTCAGCAATATGATCCAGTTTGTAC  |
|                                             |                    | R: GCAGGTCGACGGATCCAACATAGGGCCACATGTCC        |
| <i>SIHIP26 (152 aa)</i><br>(Solyc01g111600) | Y2H                | F:<br>GGAGGCCAGTGAATTCGGTGTCTTGATCACATATCTGAC |
|                                             |                    | R: CGAGCTCGATGGATCCCATGACCACACAGGCTGC         |
